# Supplementary material for: Value of Serum NEUROG1 Methylation for the Detection of Advanced Adenomas and Colorectal Cancer
Source: Diagnostics (Basel). 2020 Jun 28;10(7):437. doi: 10.3390/diagnostics10070437 (PMC7399835; doi:10.3390/diagnostics10070437)
Supplement: Supplementary file 1 [file diagnostics-10-00437-s001.zip › Supplementary tables.pdf]

**Supplementary Table 1.** Serum NEUROG1 methylation based on bisulfite pyrosequencing in the case-control cohort.

| CpG site                       | No colorectal findings (n=33) |                      | Advanced neoplasia (n=48) |                      | <i>P</i> -value <sup>1</sup> | AUC <sup>2</sup><br>(CI 95%)  |
|--------------------------------|-------------------------------|----------------------|---------------------------|----------------------|------------------------------|-------------------------------|
|                                | Mean±SD                       | Median (IQR)         | Mean±SD                   | Median (IQR)         |                              |                               |
| <b>CpG 1</b>                   | 2.31±5.76                     | 0.00<br>(0.00-2.50)  | 6.53±19.15                | 0.00<br>(0.00-2.83)  | 0.549                        | 0.532<br>(0.405-0.660)        |
| <b>CpG 2</b>                   | 5.47±5.89                     | 4.55<br>(0.0-7.42)   | 11.20±22.29               | 4.39<br>(2.72-7.42)  | 0.839                        | 0.513<br>(0.384-0.642)        |
| <b>CpG 3</b>                   | 2.02±3.92                     | 0.00<br>(0.00-3.70)  | 7.39±20.83                | 0.00<br>(0.00-3.97)  | 0.385                        | 0.549<br>(0.422-0.676)        |
| <b>CpG 4</b>                   | 4.12±4.06                     | 4.09<br>(0.00-5.61)  | 9.50±21.19                | 4.14<br>(0.00-5.67)  | 0.718                        | 0.523<br>(0.396-0.651)        |
| <b>CpG 5</b>                   | 1.31±3.42                     | 0.00<br>(0.00-0.00)  | 5.07±17.92                | 0.00<br>(0.00-0.00)  | 0.803                        | 0.511<br>(0.383-0.640)        |
| <b>CpG 6</b>                   | 3.01±4.62                     | 0.00<br>(0.00-6.05)  | 9.20±21.38                | 0.00<br>(0.00-6.29)  | 0.615                        | 0.529<br>(0.403-0.656)        |
| <b>CpG 7</b>                   | 4.39±4.72                     | 4.44<br>(0.00-6.69)  | 10.10±19.64               | 4.73<br>(0.00-9.71)  | 0.256                        | <b>0.573</b><br>(0.448-0.699) |
| <b>CpG 8</b>                   | 7.90±5.71                     | 7.73<br>(4.36-12.76) | 14.95±21.35               | 9.25<br>(6.06-13.39) | 0.113                        | <b>0.604</b><br>(0.478-0.729) |
| <b>CpG 9</b>                   | 5.78±5.97                     | 5.82<br>(0.00-8.18)  | 12.70±20.47               | 7.07<br>(5.18-12.61) | <b>0.042</b>                 | <b>0.633</b><br>(0.511-0.755) |
| <b>CpG 10</b>                  | 3.55±5.57                     | 0.00<br>(0.00-5.03)  | 9.17±21.17                | 3.16<br>(0.00-6.47)  | 0.428                        | 0.549<br>(0.422-0.675)        |
| <b>CpG 11</b>                  | 3.69±9.59                     | 0.00<br>(0.00-4.79)  | 5.86±17.82                | 0.00<br>(0.00-2.00)  | 0.765                        | 0.485<br>(0.355-0.614)        |
| <b>CpG 12</b>                  | 4.82±5.41                     | 3.95<br>(0.00-8.24)  | 11.65±20.42               | 6.12<br>(0.00-10.57) | 0.167                        | <b>0.589</b><br>(0.464-0.713) |
| <b>Mean CpG 1-12</b>           | 4.03±3.58                     | 3.15<br>(1.89-4.84)  | 9.44±19.12                | 3.55<br>(2.51-6.82)  | 0.108                        | 0.605<br>(0.479-0.731)        |
| <b>Mean CpG 7, 8, 9 and 12</b> | 5.72±4.43                     | 5.69<br>(2.52-7.24)  | 12.35±19.20               | 6.74<br>(4.85-10.75) | <b>0.021</b>                 | <b>0.652</b><br>(0.531-0.772) |

SD: standard deviation; IQR: interquartile range. <sup>1</sup>*P*-value for Mann-Whitney test for comparison of no colorectal findings and advanced neoplasia; <sup>2</sup>AUC for the detection of advanced neoplasia.

**Supplementary Table 2.** Serum NEUROG1 methylation according to demographic characteristics of the screening cohort.

| Characteristics             | n   | Mean±SD    | Median (IQR)        | P-value <sup>1</sup> |
|-----------------------------|-----|------------|---------------------|----------------------|
| Age (years)                 |     |            |                     |                      |
| <50                         | 169 | 1.18±7.09  | 0.00 (0.00-0.00)    | 0.059                |
| ≥50                         | 335 | 3.60±15.86 | 0.00 (0.00-0.00009) |                      |
| Gender                      |     |            |                     |                      |
| Male                        | 205 | 3.26±15.29 | 0.00 (0.00-0.0002)  | 0.084                |
| Female                      | 299 | 2.47±12.33 | 0.00 (0.00-0.00)    |                      |
| Familial risk               |     |            |                     |                      |
| 1 FDR ≥60 years             | 333 | 2.45±12.35 | 0.00 (0.00-0.00001) | 0.358                |
| 1 FPG <60 years<br>or 2 FDR | 171 | 3.45±15.79 | 0.00 (0.00-0.00006) |                      |

FDR: first-degree relative; SD: standard deviation; IQR: interquartile range. <sup>1</sup>P-value for Mann-Whitney test for comparison according to groups of age, gender and familial risk.
